# Supplementary material for: Enhanced Metastatic Risk Assessment in Cutaneous Squamous Cell Carcinoma with the 40-Gene Expression Profile Test
Source: Atypon-hosted journal article supplement (doi:10.2217/fon-2021-1277), 2021-11-25
Supplement: suppl_data.pdf [file suppl_data.pdf]

**Enhanced Metastatic Risk Assessment in Cutaneous Squamous Cell Carcinoma with  
the 40-Gene Expression Profile Test**

**SUPPLEMENTAL FIGURES AND TABLES**

(Suppl Fig: 2, Suppl Tables: 3)

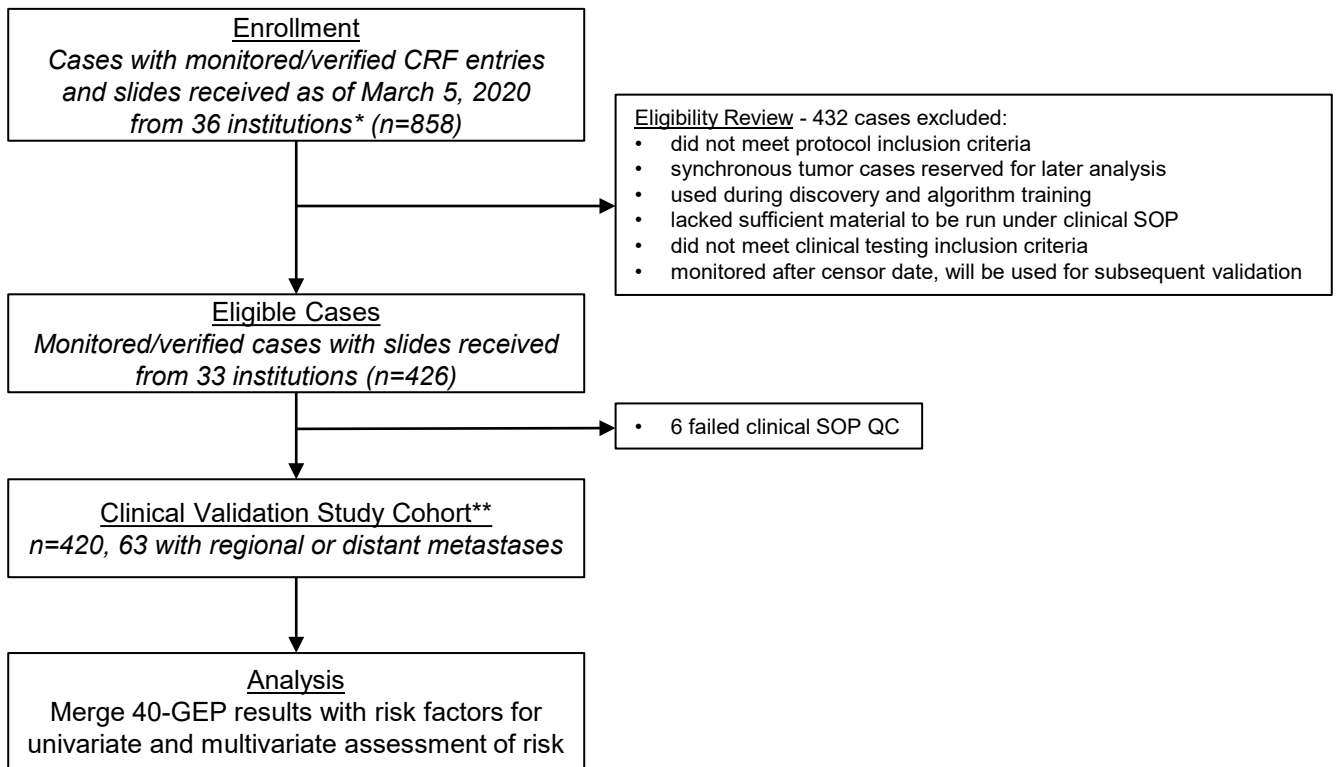

Supplemental Figure 1. Study design for the clinical validation cohort (n=420). \*Archival sample collection ongoing. \*\*Comprised of 307 previously-assessed (but not under clinical SOP, Wysong *et al.*, *JAAD* 2021)<sup>21</sup> and 113 novel samples. CRF: case report form; SOP: standard operating procedure; QC: quality control; 40-GEP: 40-gene expression profile; cSCC: cutaneous squamous cell carcinoma.

Supplemental Table 1. Risk factors captured and used for factor count by case.

| <i>Risk Factors</i>                                                                                                                                                                                                              | <i>Factor Count</i> |
|----------------------------------------------------------------------------------------------------------------------------------------------------------------------------------------------------------------------------------|---------------------|
| Tumor size and location* <ul style="list-style-type: none"> <li>Any size on the head, neck, genitalia, hands, feet or pretibial surface (Areas H or M), or</li> <li>≥2 cm size on any other area of the body (Area L)</li> </ul> | 1                   |
| Immunosuppression**                                                                                                                                                                                                              | 1                   |
| Perineural invasion: Large (≥0.1 mm), named nerve involvement, <0.1 mm in caliber, or unknown caliber                                                                                                                            | 1                   |
| Depth (any one or combination of) <ul style="list-style-type: none"> <li>Invasion beyond subcutaneous fat</li> <li>Depth ≥2 mm</li> <li>Clark level ≥IV</li> </ul>                                                               | 1                   |
| Poorly differentiated tumor histology                                                                                                                                                                                            | 1                   |
| Aggressive histologic subtypes***                                                                                                                                                                                                | 1                   |
| Lymphovascular invasion                                                                                                                                                                                                          | 1                   |
| <b>TOTAL POSSIBLE RISK FACTOR COUNT#</b>                                                                                                                                                                                         | <b>7</b>            |

\*Size and location criteria as defined in NCCN guidelines and more inclusive Mohs appropriate use criteria: Area H, 'mask areas' of face (central face, eyelids, eyebrows, periorbital, nose, lips [cutaneous and vermillion], chin, mandible, preauricular and postauricular skin/sulci, temple, and ear), genitalia, hands, and feet; Area M, cheeks, forehead, scalp, neck, and pretibia; and Area L, trunk and extremities (excluding hands, nail units, pretibial, ankles, and feet). \*\*Types of immunosuppression included per protocol were from organ transplant, leukemia, lymphoma, HIV. \*\*\*Any of: acantholytic, adenosquamous, pagetoid spread, desmoplastic, sclerosing, basosquamous, small cell, spindle cell/sarcomatoid, infiltrating, clear cell, lymphoepithelial, single cell spread, or metaplastic/carcinosarcomatous. #Note, tumors with poorly defined borders, that were rapidly growing, with neurologic symptoms in tumor region, and/or at a site of prior radiation therapy or chronic inflammatory process were not captured by this current study; however, they will be allowed for clinical testing as defined as high risk per NCCN.

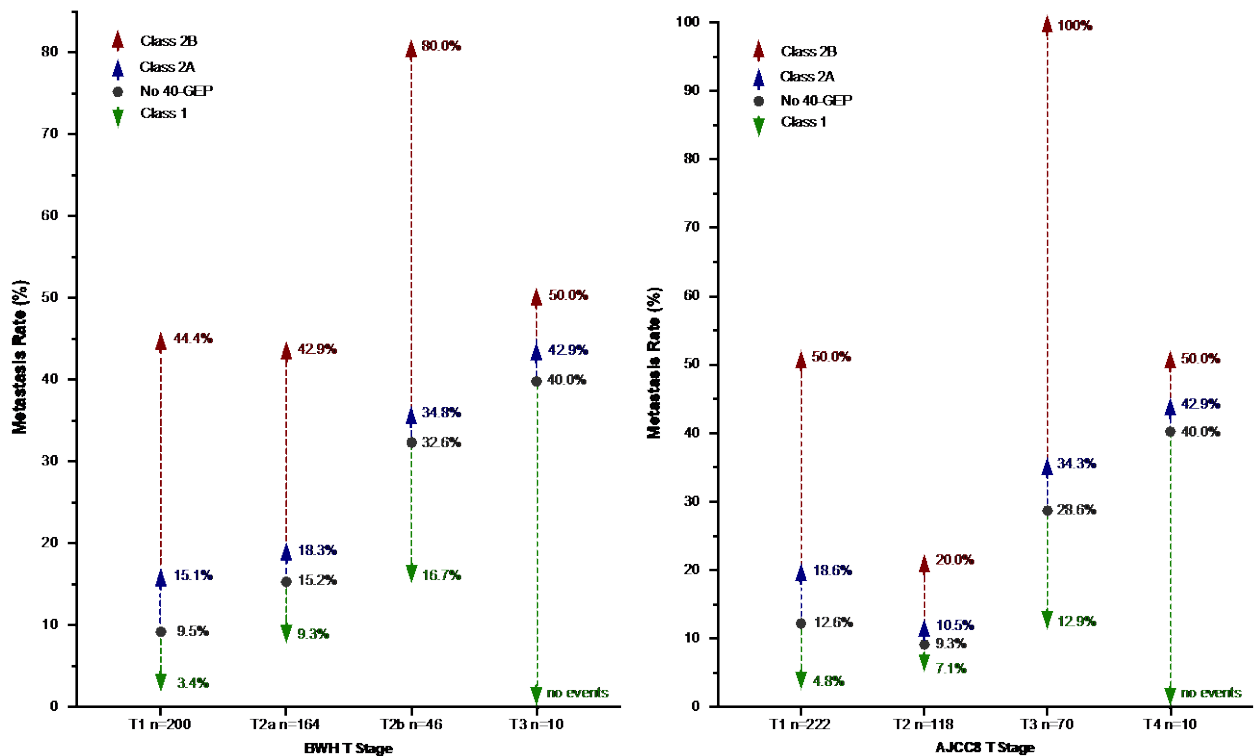

Supplemental Figure 2. Further stratification of metastatic risk by the 40-GEP test per BWH or AJCC8 T stage for the cSCC Validation Cohort (n=420). 40-GEP, 40-gene expression profile; BWH, Brigham and Women's Hospital; AJCC8, American Joint Committee on Cancer, Cancer Staging Manual, Eighth Edition; cSCC, cutaneous squamous cell carcinoma.

Supplemental Table 2. Metastasis rates by 40-GEP and BWH T stage or AJCC8 T stage.

| 40-GEP Result   | T1/T2a BWH T stage  |                   | T2b/T3 BWH T stage  |                   |
|-----------------|---------------------|-------------------|---------------------|-------------------|
|                 | No. Cases           | No. Mets (rate)   | No. Cases           | No. Mets (rate)   |
| <b>Class 1</b>  | <b>193</b>          | <b>11 (5.7%)</b>  | <b>19</b>           | <b>3 (15.8%)</b>  |
|                 | <i>T1: 118</i>      | <i>4 (3.4%)</i>   | <i>T2b: 18</i>      | <i>3 (16.7%)</i>  |
|                 | <i>T2a: 75</i>      | <i>7 (9.3%)</i>   | <i>T3: 1</i>        | <i>0 (0%)</i>     |
| <b>Class 2A</b> | <b>155</b>          | <b>26 (16.8%)</b> | <b>30</b>           | <b>11 (36.7%)</b> |
|                 | <i>T1: 73</i>       | <i>11 (15.1%)</i> | <i>T2b: 23</i>      | <i>8 (34.8%)</i>  |
|                 | <i>T2a: 82</i>      | <i>15 (18.3%)</i> | <i>T3: 7</i>        | <i>3 (42.9%)</i>  |
| <b>Class 2B</b> | <b>16</b>           | <b>7 (43.8%)</b>  | <b>7</b>            | <b>5 (71.4%)</b>  |
|                 | <i>T1: 9</i>        | <i>4 (44.4%)</i>  | <i>T2b: 5</i>       | <i>4 (80.0%)</i>  |
|                 | <i>T2a: 7</i>       | <i>3 (42.9%)</i>  | <i>T3: 2</i>        | <i>1 (50.0%)</i>  |
| <b>Pre-Test</b> | <b>364</b>          | <b>44 (12.1%)</b> | <b>56</b>           | <b>19 (33.9%)</b> |
|                 | <i>T1: 200</i>      | <i>19 (9.5%)</i>  | <i>T2b: 46</i>      | <i>15 (32.6%)</i> |
|                 | <i>T2a: 164</i>     | <i>25 (15.2%)</i> | <i>T3: 10</i>       | <i>4 (40.0%)</i>  |
| 40-GEP Result   | T1/T2 AJCC8 T stage |                   | T3/T4 AJCC8 T stage |                   |
|                 | No. Cases           | No. Mets (rate)   | No. Cases           | No. Mets (rate)   |
| <b>Class 1</b>  | <b>180</b>          | <b>10 (5.6%)</b>  | <b>32</b>           | <b>4 (12.5%)</b>  |
|                 | <i>T1: 124</i>      | <i>6 (4.8%)</i>   | <i>T3: 31</i>       | <i>4 (12.9%)</i>  |
|                 | <i>T2: 56</i>       | <i>4 (7.1%)</i>   | <i>T4: 1</i>        | <i>0 (0%)</i>     |
| <b>Class 2A</b> | <b>143</b>          | <b>22 (15.4%)</b> | <b>42</b>           | <b>15 (35.7%)</b> |
|                 | <i>T1: 86</i>       | <i>16 (18.6%)</i> | <i>T3: 35</i>       | <i>12 (34.3%)</i> |
|                 | <i>T2: 57</i>       | <i>6 (10.5%)</i>  | <i>T4: 7</i>        | <i>3 (42.9%)</i>  |
| <b>Class 2B</b> | <b>17</b>           | <b>7 (41.2%)</b>  | <b>6</b>            | <b>5 (83.3%)</b>  |
|                 | <i>T1: 12</i>       | <i>6 (50.0%)</i>  | <i>T3: 4</i>        | <i>4 (100.0%)</i> |
|                 | <i>T2: 5</i>        | <i>1 (20.0%)</i>  | <i>T4: 2</i>        | <i>1 (50.0%)</i>  |
| <b>Pre-Test</b> | <b>340</b>          | <b>39 (11.5%)</b> | <b>80</b>           | <b>24 (30.0%)</b> |
|                 | <i>T1: 222</i>      | <i>28 (12.6%)</i> | <i>T3: 70</i>       | <i>20 (28.6%)</i> |
|                 | <i>T2: 118</i>      | <i>11 (9.3%)</i>  | <i>T4: 10</i>       | <i>4 (40.0%)</i>  |

Abbreviations: GEP, gene expression profile; BWH, Brigham and Women's Hospital; AJCC8, American Joint Committee on Cancer (AJCC) Cancer Staging Manual, 8<sup>th</sup> Edition.

Supplemental Table 3. Univariate and multivariate Cox regression analyses of risk for metastasis per 40-GEP Class and individual BWH and AJCC8 T stages in cSCC validation cases.

| Risk Factor          | n   | Univariate Cox Regression |         | Multivariate Cox Regression* |         |
|----------------------|-----|---------------------------|---------|------------------------------|---------|
|                      |     | Hazard Ratio (95% CI)     | p value | Hazard Ratio (95% CI)        | p value |
| <b>40-GEP Result</b> |     |                           |         |                              |         |
| <b>Class 1</b>       | 212 | 1.00 (---)                | ---     | 1.00 (---)                   | ---     |
| <b>Class 2A</b>      | 185 | 3.22 (1.74-5.95)          | <0.001  | 2.87 (1.54-5.35)             | <0.001  |
| <b>Class 2B</b>      | 23  | 11.61 (5.36-25.15)        | <0.001  | 9.86 (4.44-21.9)             | <0.001  |
| <b>BWH T Stage</b>   |     |                           |         |                              |         |
| T1                   | 200 | 1.00 (---)                | ---     | 1.00 (---)                   | ---     |
| T2a                  | 164 | 1.64 (0.90-2.97)          | 0.106   | 1.48 (0.81-2.71)             | 0.199   |
| T2b                  | 46  | 3.97 (2.02-7.82)          | <0.001  | 3.21 (1.62-6.35)             | <0.001  |
| T3                   | 10  | 4.68 (1.59-13.77)         | 0.005   | 2.14 (0.70-6.50)             | 0.181   |
| <b>40-GEP Result</b> |     |                           |         |                              |         |
| <b>Class 1</b>       | 212 | 1.00 (---)                | ---     | 1.00 (---)                   | ---     |
| <b>Class 2A</b>      | 185 | 3.22 (1.74-5.95)          | <0.001  | 3.10 (1.67-5.75)             | <0.001  |
| <b>Class 2B</b>      | 23  | 11.61 (5.36-25.15)        | <0.001  | 13.27 (5.90-29.84)           | <0.001  |
| <b>AJCC8 T Stage</b> |     |                           |         |                              |         |
| T1                   | 222 | 1.00 (---)                | ---     | 1.00 (---)                   | ---     |
| T2                   | 118 | 0.72 (0.36-1.44)          | 0.347   | 0.65 (0.32-1.30)             | 0.222   |
| T3                   | 70  | 2.47 (1.39-4.39)          | 0.002   | 2.63 (1.46-4.74)             | 0.001   |
| T4                   | 10  | 3.46 (1.21-9.88)          | 0.020   | 1.48 (0.50-4.38)             | 0.474   |

Abbreviations: 40-GEP, 40-gene expression profile; BWH, Brigham and Women's Hospital; AJCC8, American Joint Committee on Cancer (AJCC) Cancer Staging Manual, 8<sup>th</sup> Edition; cSCC, cutaneous squamous cell carcinoma. \*n=393, 54 events, excluding cases without tumor diameter reported. \*\*Perineural invasion was considered positive regardless of nerve caliber. #Deep invasion: beyond the subcutaneous fat, depth >6mm or Clark level V. ##Tumor diameter: continuous variable per cm.
